# Supplementary material for: Typing of Mycobacterium avium Subspecies paratuberculosis Isolates from Newfoundland Using Fragment Analysis
Source: PubMed Central journal article supplement (PMC4415927; doi:10.1371/journal.pone.0126071), 2015-04-30
Supplement: pone.0126071.s001.pdf [file pone.0126071.s001.pdf]

**S1 Table. Details of 18 animals from Newfoundland regarding assigned identification numbers (IDs) and status of the animal from which the primary Trek-ESP II liquid cultures were derived.**

| <b>Farm/animal ID<sup>a</sup></b> | <b>Animal status/symptoms<sup>b</sup></b> |
|-----------------------------------|-------------------------------------------|
| A-001                             | Clinical signs                            |
| A-002                             | Clinical signs                            |
| A-005                             | Clinical signs                            |
| A-006                             | Milk Positive for <i>Map</i>              |
| A-007                             | Milk Positive for <i>Map</i>              |
| A-008                             | Milk Positive for <i>Map</i>              |
| A-009                             | Milk Positive for <i>Map</i>              |
| A-010                             | Milk Positive for <i>Map</i>              |
| A-011                             | Clinical signs                            |
| C-001                             | Clinical signs                            |
| C-002                             | Clinical signs                            |
| C-003                             | Clinical signs                            |
| C-004                             | Clinical signs                            |
| C-005                             | Clinical signs                            |
| D-001                             | Clinical signs                            |
| E-001                             | Clinical signs                            |
| F-001                             | Normal                                    |
| F-002                             | Normal                                    |

<sup>a</sup> The first letter denotes the farm of origin followed by a discreet identification number assigned to each respective animal (ID: Identity).

<sup>b</sup> The status of each animal sampled for Trek-ESP II liquid culture for *Map* analysis is included. Animals were either asymptomatic (normal), showed clinical signs of Johne's disease or had milk samples which showed a positive immune response against *Map* during previous surveys.
