# Supplementary material for: Typing of Mycobacterium avium Subspecies paratuberculosis Isolates from Newfoundland Using Fragment Analysis
Source: PubMed Central journal article supplement (PMC4415927; doi:10.1371/journal.pone.0126071), 2015-04-30
Supplement: pone.0126071.s002.pdf [file pone.0126071.s002.pdf]

**S2 Table. Fragment analysis results for the 4 SSR loci of all 85 MAP isolates derived from 18 Newfoundland animals. Strain types were designated as M1-M40 based on their unique SSR combinations.**

| Farm/animal/isolate ID <sup>a</sup> | DTP <sup>b</sup> | L-1 (G) <sup>c</sup> | L-2 (G) <sup>c</sup> | L-3 (GGT) <sup>c</sup> | L-4 (TGC) <sup>c</sup> | Strain Type |
|-------------------------------------|------------------|----------------------|----------------------|------------------------|------------------------|-------------|
| A-001-1                             | 27               | 16                   | 10                   | 5                      | 5                      | M4          |
| A-001-2                             | 27               | 10                   | 10                   | 5                      | 5                      | M9          |
| A-001-3                             | 27               | 15                   | 10                   | 5                      | 5                      | M2          |
| A-001-4                             | 27               | 12                   | 10                   | 5                      | 5                      | M1          |
| A-001-5                             | 27               | 16                   | 9                    | 5                      | 5                      | M31         |
| A-003-1                             | 32               | 13                   | 11                   | 5                      | 5                      | M5          |
| A-003-2                             | 32               | 14                   | 11                   | 5                      | 5                      | M6          |
| A-003-4                             | 32               | 21                   | 10                   | 5                      | 5                      | M40         |
| A-003-5                             | 32               | 14                   | 11                   | 5                      | 5                      | M6          |
| A-005-1                             | 13               | 12                   | 10                   | 5                      | 5                      | M1          |
| A-005-2                             | 13               | 15                   | 10                   | 5                      | 5                      | M2          |
| A-005-3                             | 13               | 12                   | 10                   | 5                      | 5                      | M1          |
| A-005-4                             | 13               | 13                   | 11                   | 5                      | 5                      | M5          |
| A-005-5                             | 13               | 11                   | 10                   | 5                      | 5                      | M3          |
| A-006-1                             | 28               | 13                   | 10                   | 5                      | 5                      | M12         |
| A-006-2                             | 28               | 16                   | 12                   | 5                      | 5                      | M33         |
| A-006-3                             | 28               | 12                   | 10                   | 5                      | 5                      | M1          |
| A-006-4                             | 28               | 12                   | 9                    | 5                      | 5                      | M11         |
| A-006-5                             | 28               | 16                   | 11 <sup>d</sup>      | 5                      | 5                      | M32         |
| A-007-1                             | 22               | 11                   | 10                   | 5                      | 5                      | M3          |
| A-007-2                             | 22               | 12                   | 10                   | 5                      | 5                      | M1          |
| A-007-3                             | 22               | 15                   | 10                   | 5                      | 5                      | M2          |
| A-007-4                             | 22               | 15                   | 10                   | 5                      | 5                      | M2          |
| A-007-5                             | 22               | 11                   | 10                   | 5                      | 5                      | M3          |
| A-008-1                             | 46               | 18                   | 10                   | 5                      | 5                      | M36         |
| A-008-2                             | 46               | 16                   | 10                   | 5                      | 5                      | M4          |
| A-008-3                             | 46               | 20                   | 10                   | 5                      | 5                      | M15         |
| A-008-4                             | 46               | 7                    | 10                   | 5                      | 5                      | M21         |
| A-008-5                             | 46               | 17                   | 11                   | 5                      | 5                      | M14         |
| A-009-1                             | 36               | 13                   | 11                   | 5                      | 5                      | M5          |
| A-009-2                             | 36               | 11                   | 11                   | 5                      | 5                      | M10         |
| A-009-3                             | 36               | 14                   | 11                   | 5                      | 5                      | M6          |
| A-009-4                             | 36               | 20                   | 11                   | 5                      | 5                      | M39         |
| A-009-5                             | 36               | 13                   | 11                   | 5                      | 5                      | M5          |
| A-010-1                             | 49               | 14                   | 10                   | 5                      | 5                      | M13         |
| A-010-2                             | 49               | 14                   | 9                    | 5                      | 5                      | M27         |

|         |    |                 |                 |   |   |     |
|---------|----|-----------------|-----------------|---|---|-----|
| A-010-3 | 49 | 12              | 10              | 5 | 5 | M1  |
| A-010-4 | 49 | 11              | 9               | 5 | 5 | M24 |
| A-010-5 | 49 | 16              | 10              | 5 | 5 | M4  |
| A-011-1 | 8  | 15              | 11              | 5 | 5 | M29 |
| A-011-2 | 8  | 12              | 11              | 5 | 5 | M26 |
| A-011-3 | 8  | 15              | 11              | 5 | 5 | M29 |
| A-011-4 | 8  | 10              | 11              | 5 | 5 | M23 |
| A-011-5 | 8  | 15              | 10              | 5 | 5 | M2  |
| C-001-1 | 28 | 10 <sup>d</sup> | 10              | 5 | 5 | M9  |
| C-001-2 | 28 | 10              | 10              | 5 | 5 | M9  |
| C-001-3 | 28 | 11              | 10              | 5 | 5 | M3  |
| C-001-4 | 28 | 10              | 10              | 5 | 5 | M9  |
| C-001-5 | 28 | 11              | 10              | 5 | 5 | M3  |
| C-002-1 | 28 | 6               | 11              | 4 | 4 | M16 |
| C-002-2 | 28 | 16              | 10              | 5 | 5 | M4  |
| C-002-3 | 28 | 15              | 10              | 5 | 5 | M2  |
| C-002-4 | 28 | 7               | 11              | 4 | 4 | M19 |
| C-002-5 | 28 | 6               | 11              | 4 | 4 | M16 |
| C-003-1 | 17 | 16              | 14              | 5 | 5 | M34 |
| C-003-2 | 17 | 14              | 13              | 5 | 5 | M28 |
| C-003-3 | 17 | 16              | 14              | 5 | 5 | M34 |
| C-003-4 | 17 | 14              | 13              | 5 | 5 | M28 |
| C-003-5 | 17 | 15              | 13              | 5 | 5 | M30 |
| C-004-1 | 32 | 10              | 11              | 4 | 5 | M7  |
| C-004-2 | 32 | 11              | 12              | 4 | 5 | M25 |
| C-004-3 | 32 | 10              | 11              | 4 | 5 | M7  |
| C-004-4 | 32 | 11              | 12              | 4 | 5 | M25 |
| C-004-5 | 32 | 10              | 12              | 4 | 5 | M8  |
| C-005-1 | 40 | 11              | 10              | 5 | 5 | M3  |
| C-005-2 | 40 | 10              | 12 <sup>d</sup> | 4 | 5 | M8  |
| C-005-3 | 40 | 12              | 10              | 5 | 5 | M1  |
| C-005-4 | 40 | 10              | 12 <sup>d</sup> | 4 | 5 | M8  |
| C-005-5 | 40 | 11              | 11 <sup>d</sup> | 5 | 5 | M10 |
| D-001-1 | 13 | 6               | 15              | 4 | 4 | M18 |
| D-001-2 | 13 | 7               | 15              | 4 | 4 | M22 |
| D-001-3 | 13 | 6               | 14              | 4 | 4 | M17 |
| E-001-1 | 18 | 10              | 11              | 4 | 5 | M7  |
| E-001-2 | 18 | 20 <sup>d</sup> | 10              | 5 | 5 | M15 |
| E-001-3 | 18 | 14              | 10              | 5 | 5 | M13 |
| E-001-4 | 18 | 13              | 10              | 5 | 5 | M12 |
| E-001-5 | 18 | 7               | 11              | 6 | 5 | M20 |
| F-001-1 | 19 | 20              | 9               | 5 | 5 | M38 |
| F-001-2 | 19 | 18              | 9               | 5 | 5 | M35 |

|         |    |    |    |   |   |     |
|---------|----|----|----|---|---|-----|
| F-001-3 | 19 | 12 | 9  | 5 | 5 | M11 |
| F-002-1 | 35 | 18 | 11 | 5 | 5 | M37 |
| F-002-2 | 35 | 14 | 11 | 5 | 5 | M6  |
| F-002-3 | 35 | 17 | 11 | 5 | 5 | M14 |
| F-002-4 | 35 | 17 | 11 | 5 | 5 | M14 |
| F-002-5 | 35 | 18 | 11 | 5 | 5 | M37 |

<sup>a</sup>The first letter denotes the farm of origin followed by a number assigned to the animal and the last number corresponds to the single colony/isolate from 7H11 plates that were used in the analysis.

<sup>b</sup>DTP: Days of incubation after which growth was detected in the automated Trek-ESP II liquid culture system.

<sup>c</sup> Genotyping of SSRs (mononucleotide or trinucleotide) for the four loci (L): locus 1 (G repeats), locus 2 (G repeats), locus 3 (GGT repeats) and locus 4 (TGC repeats).

<sup>d</sup> PCR fragments from these isolates displayed two peaks (n, n+1) and exact copy number of the SSR could not be determined. For reporting and analysis purposes, the lower copy number was chosen for assigning SSR types.
